# Supplementary material for: Epigenetic modification and inheritance in sexual reversal of fish
Source: HighWire-hosted journal article supplement (doi:10.1101/gr.162172.113), 2014-02-02
Supplement: Supplemental_Data.pdf [file Supplemental_Data.pdf]

## Supplemental Data

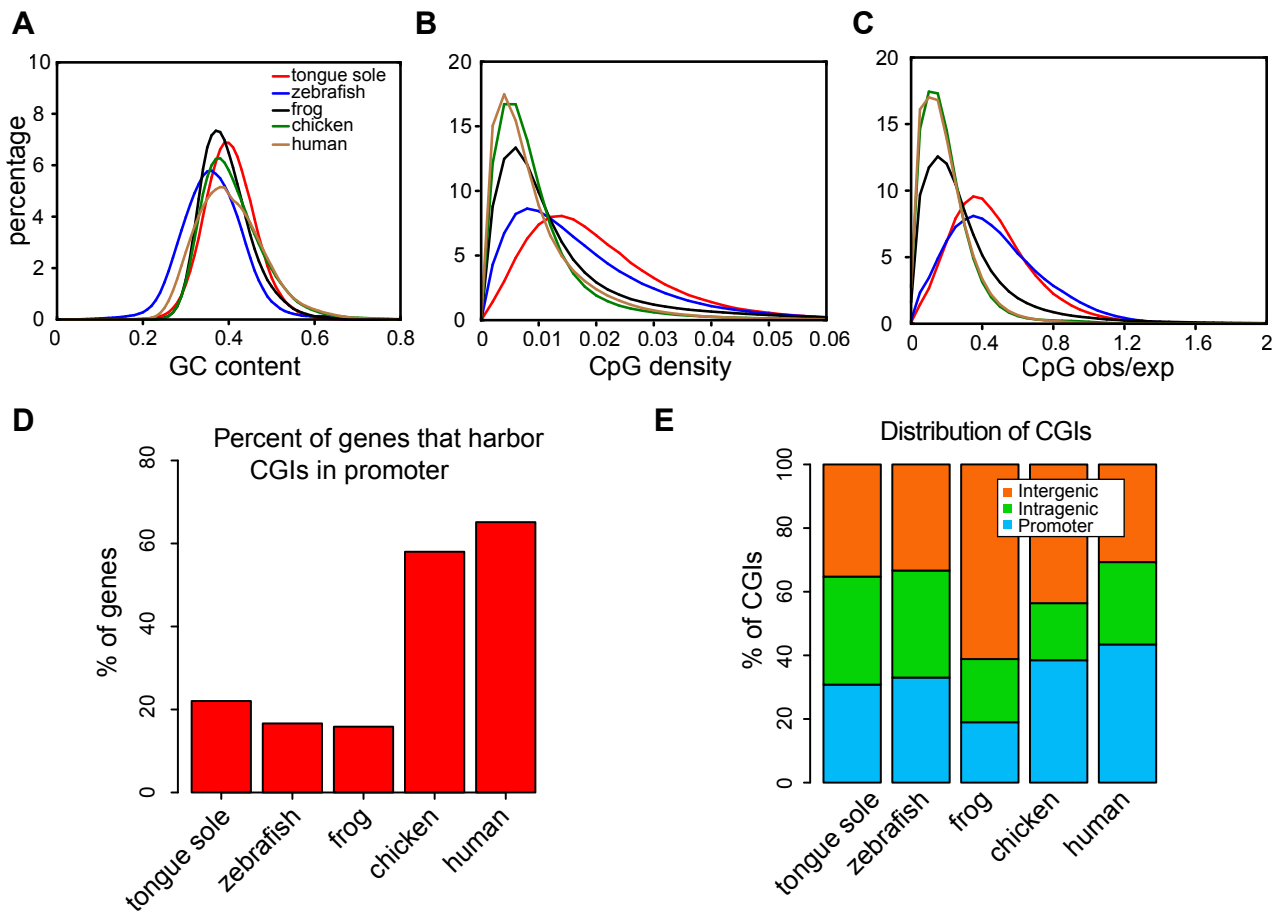

**Figure S1. Comparison of genomic characteristics between tongue sole and other vertebrates.** (A) GC content, (B) CpG density and (C) CpG o/e of the genomes of tongue sole (*C. semilaevis*), zebrafish (*D. rerio*), frog (*X. tropicalis*), chicken (*G. gallus*) and human (*H. sapiens*) calculated by 500-bp non-overlap sliding windows. For a given window, where  $nC$ ,  $nG$  and  $nCpG$  refer to the number of observed C, G and CpG and  $l$  refers to the length of the window, GC content is calculated as  $(nC + nG) / l$ , CpG density is calculated as  $nCpG / (l - 1)$ , and CpG o/e is calculated as  $nCpG / (nC * nG * (l * l) / (l - 1))$ . (D) Percentage of genes that harbor one or more CGIs in promoter regions. CGIs of tongue sole were identified by makeCGI (version 1.2, <http://rafalab.jhsph.edu/CGI/>) (Wu et al. 2010), and CGIs of zebrafish, frog, chicken and human were downloaded from UCSC Table Browser (<http://genome.ucsc.edu/>). (E) Genomic distribution of CGIs in different species. In general, the characteristics of the tongue sole genome are similar to that of zebrafish, e.g. both the genomes of tongue sole and zebrafish have higher CpG density and CpG o/e than that of frog, chicken and human, and have much fewer genes that contain CGIs in promoter regions compared with chicken and human.

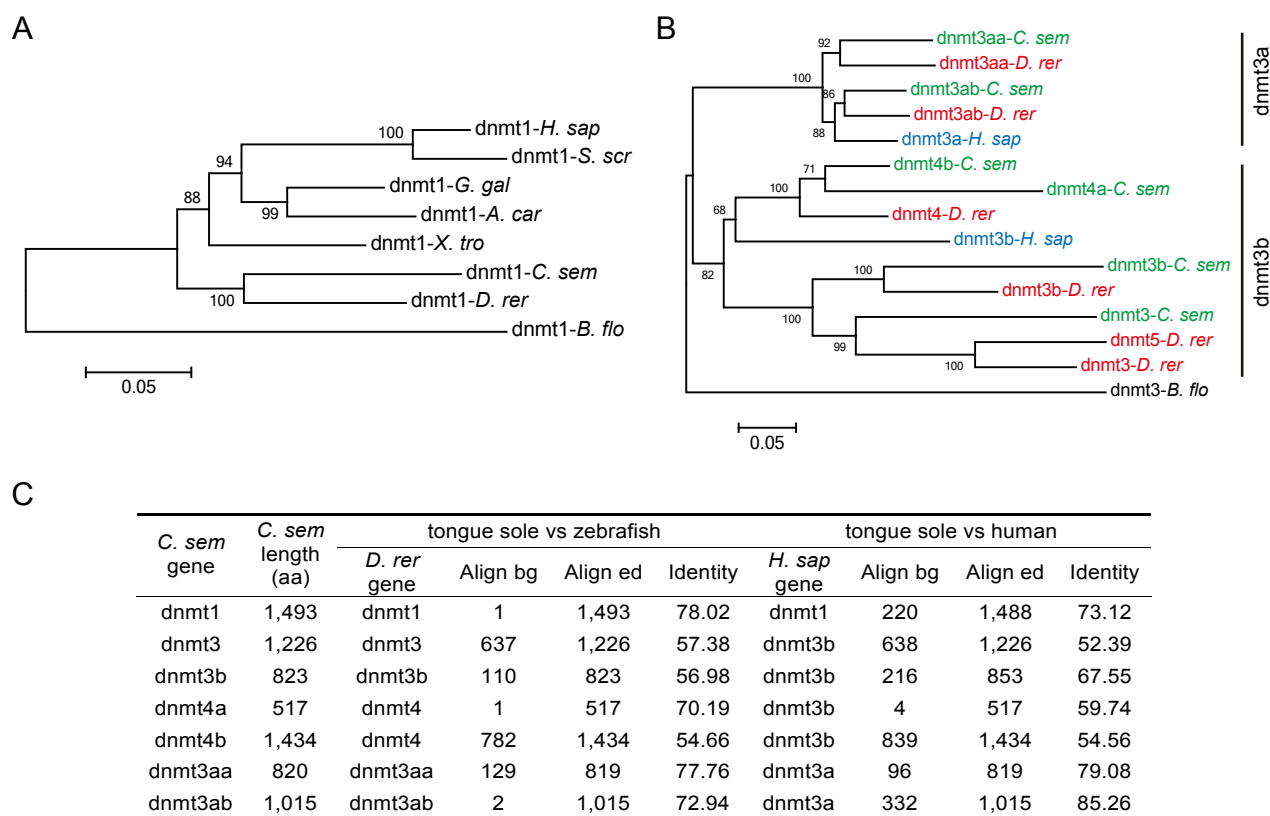

**Figure S2. *Dnmt* genes of tongue sole.** (A) Phylogenetic tree of the *dnmt1* protein sequences in different vertebrates. *Dnmt1* of *B. floridae* was selected as the outgroup. As observed in other vertebrates, the tongue sole genome encode only one *dnmt1* gene. (B) Phylogenetic tree of the *dnmt3* families in different vertebrates. *Dnmt3* of *B. floridae* was selected as the outgroup. As observed in zebrafish (Campos et al. 2012), the *dnmt3* family gene of tongue sole was expanded due to the teleost-specific whole genome duplication (so-called 3R-WGD) followed by lineage-specific duplication of *dnmt3b*, leading to a total of six *dnmt3* paralogues (two *dnmt3a* and four *dnmt3b* compared with mammals). However, the tongue sole genome lacks the ortholog of *dnmt5* in zebrafish, but encodes two *dnmt4* paralogues (named *dnmt4a* and *dnmt4b*, respectively) instead, indicating that after 3R-WGD, different duplication events of *dnmt3b* have occurred in the tongue sole and zebrafish lineages separately. (C) Identity of the *dnmt* proteins between tongue sole and zebrafish (or human). Protein identities were obtained by BLASTP alignment (Altschul et al. 1997).

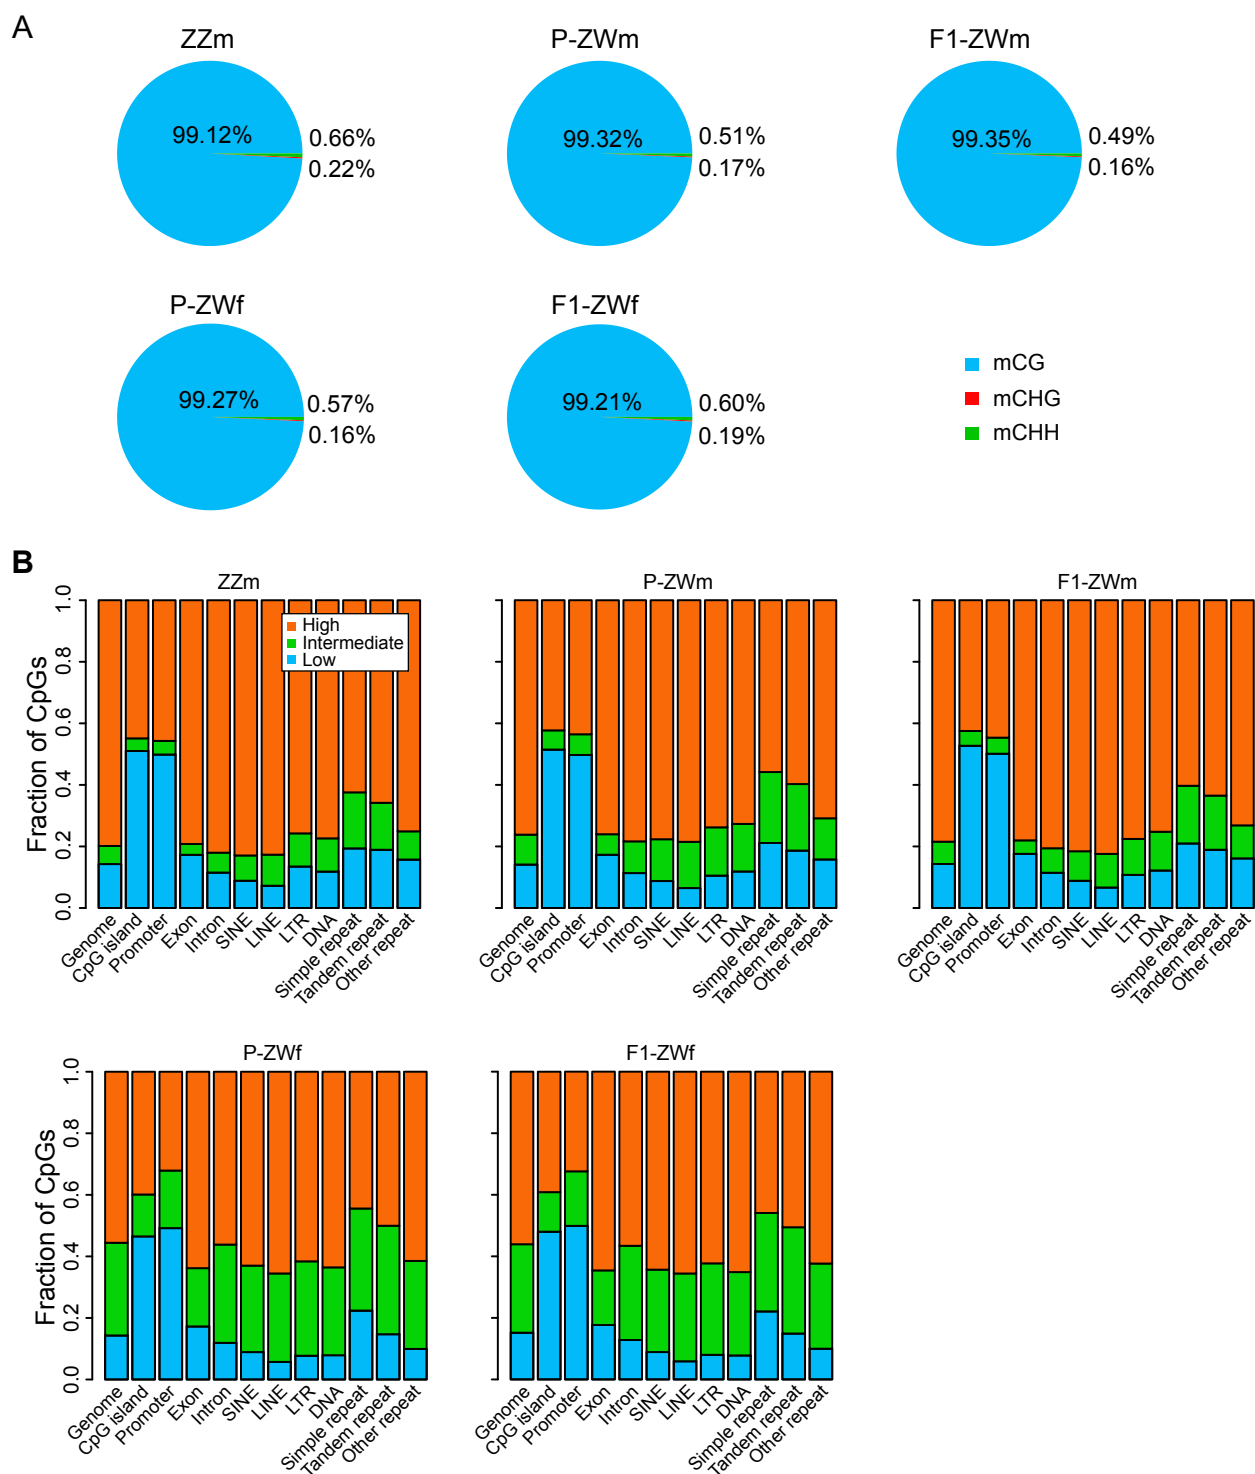

**Figure S3. Characteristics of DNA methylation in half-smooth tongue sole.** (A) Percentage of mCs in CG, CHG and CHH context. (B) Fraction of CpG in low (methylation level < 0.25), intermediate (between 0.25 and 0.75) and high (> 0.75) methylation level in different genomic elements.

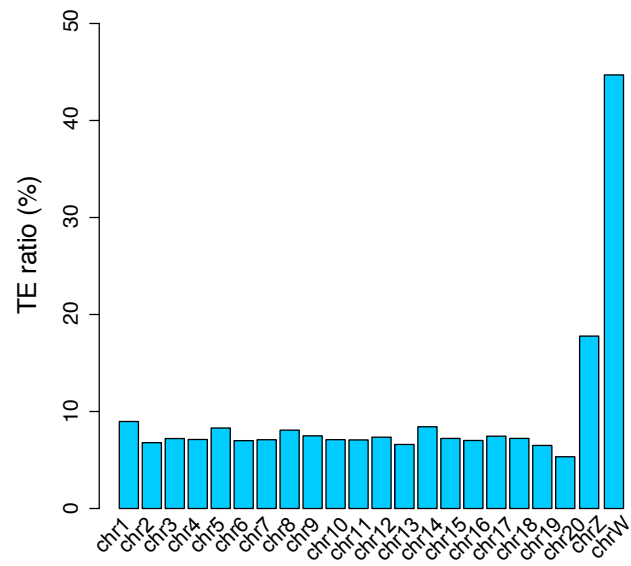

**Figure S4. TE ratios in different chromosomes.** TE ratio of each chromosome was calculated as dividing the total length of TEs in the chromosome by the length (excluding Ns) of this chromosome.

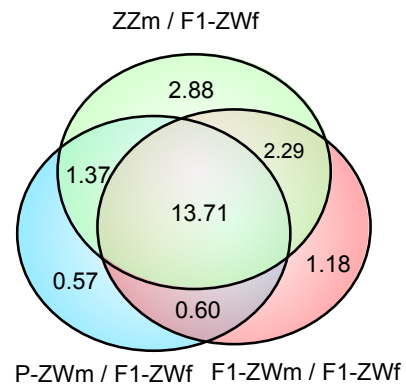

**Figure S5. Venn diagrams for DMRs of P-ZWm/F1-ZWf, F1-ZWm/F1-ZWf and ZZm/F1-ZWf.** Numbers represent the total length (Mb) of shared DMRs.

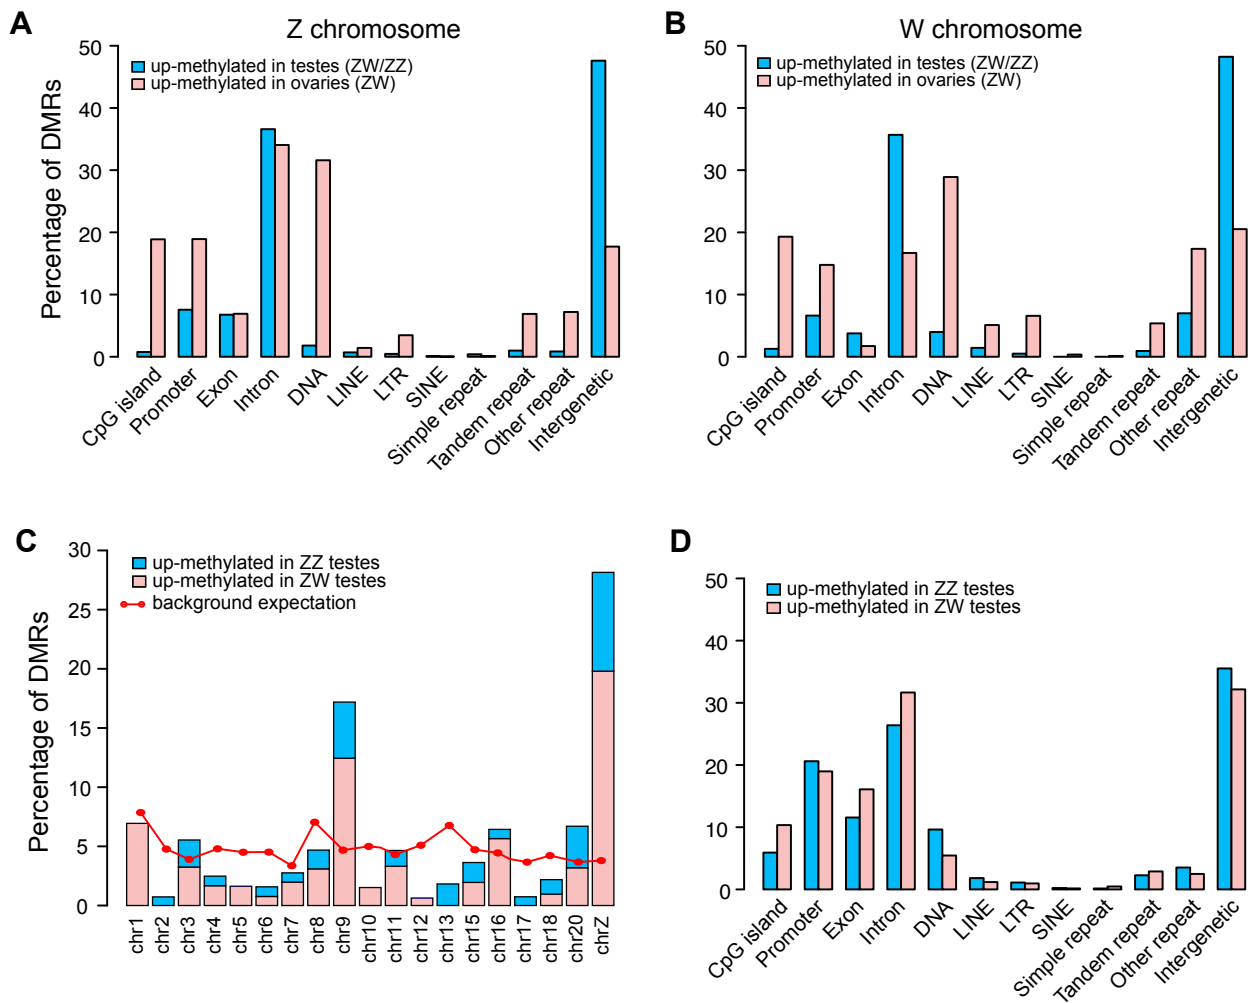

**Figure S6. Distribution of DMRs in the tongue sole genome.** (A) Percentage of Z chromosomal testis/ovary DMRs on different genomic elements. (B) Percentage of W chromosomal testis/ovary DMRs on different genomic elements. (C) Percentage of ZW-testis/ZZ-testis DMRs on different chromosomes. Background expectation for each chromosome was calculated as the covered length ( $\geq 6X$  in P-ZWm, F1-ZWm and ZZm) of each chromosome divided by the total covered length of all chromosomes. (D) Percentage of ZW-testis/ZZ-testis DMRs on different genomic elements.

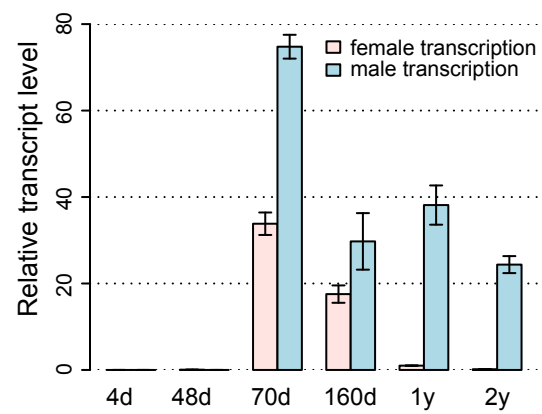

**Figure S7. Transcription of *gsdf* in different development stages post hatching.**





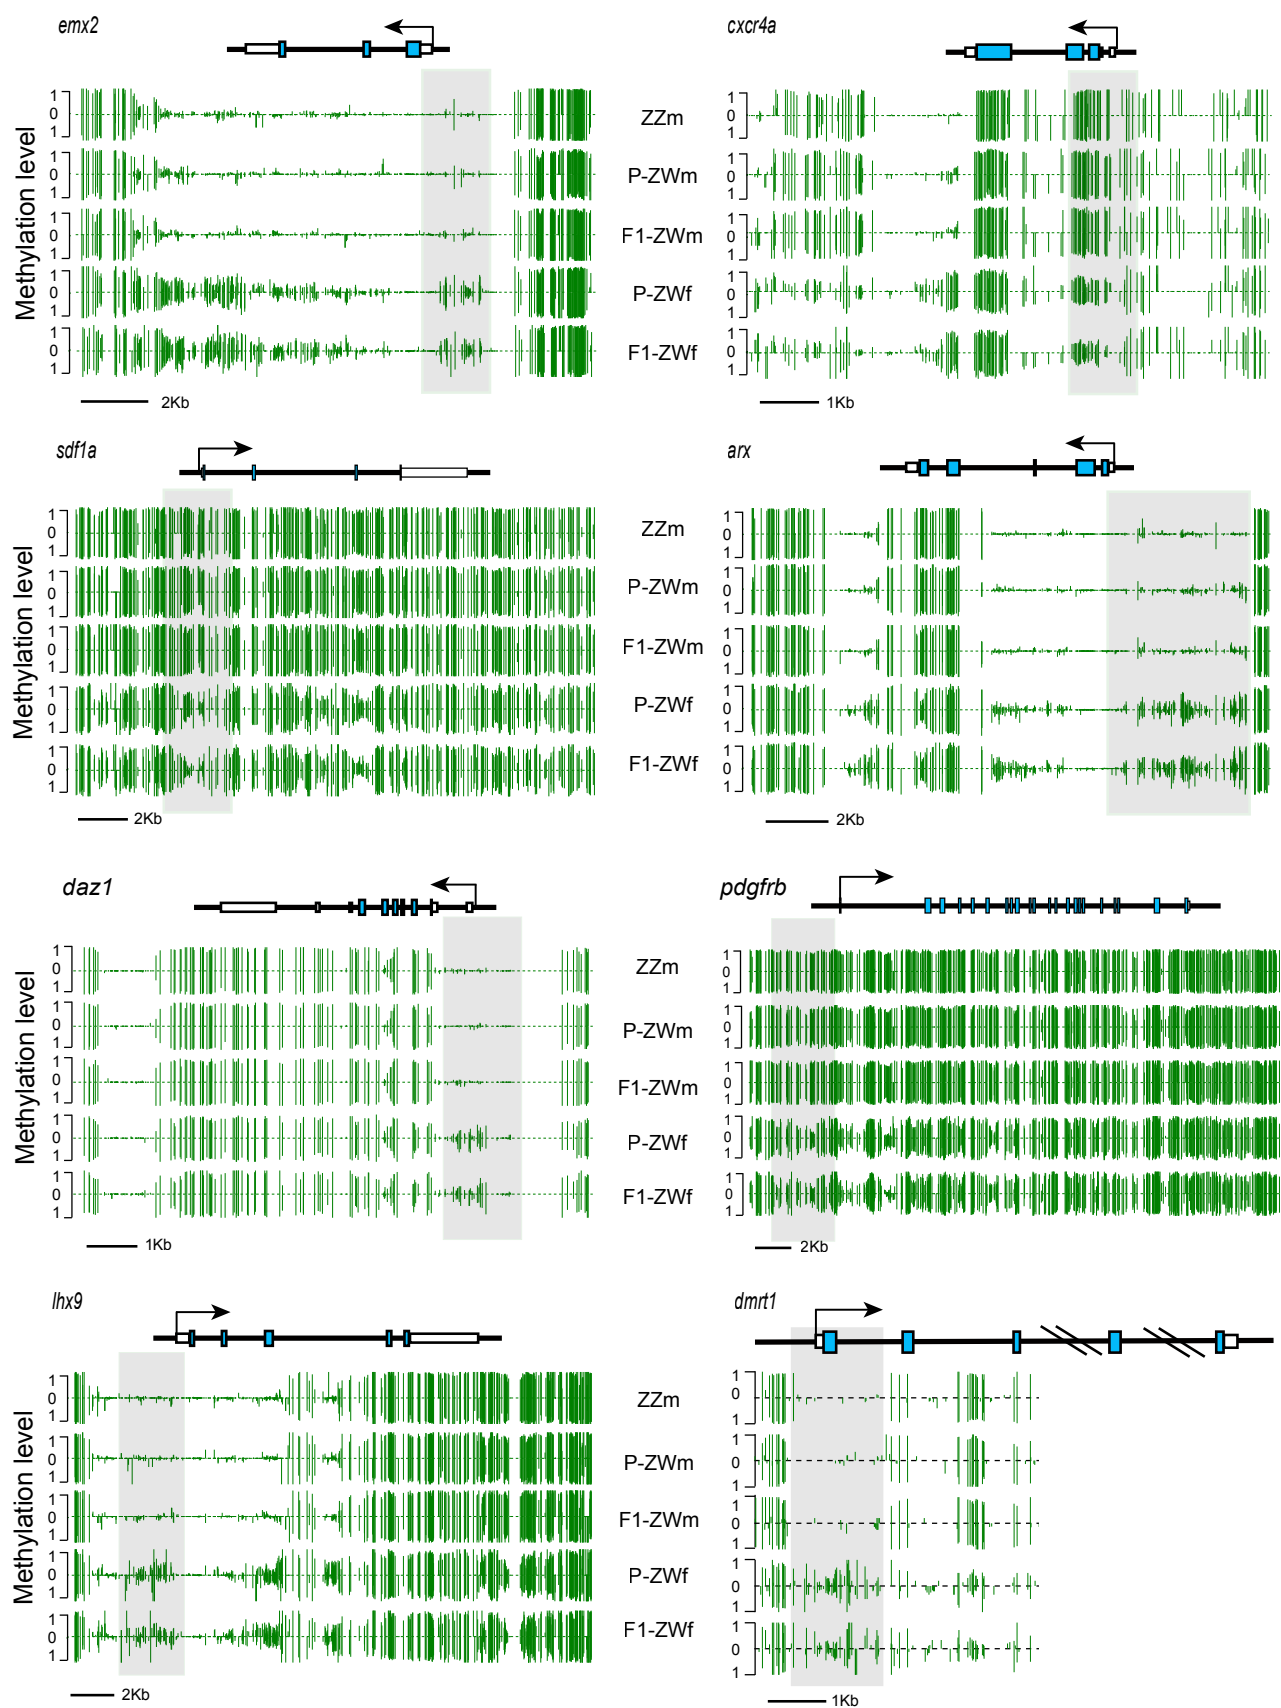

**Figure S8. DNA Methylation profiles of *amh*, *amhr2*, *wt1a*, *wt1b*, *vasa*, *cyp19a1a*, *emx2*, *cxcr4a*, *sdf1a*, *arx*, *daz1*, *pdgfrb* and *lhx9* and *dmrt1*.** Green vertical lines indicating methylation levels of individual cytosines.

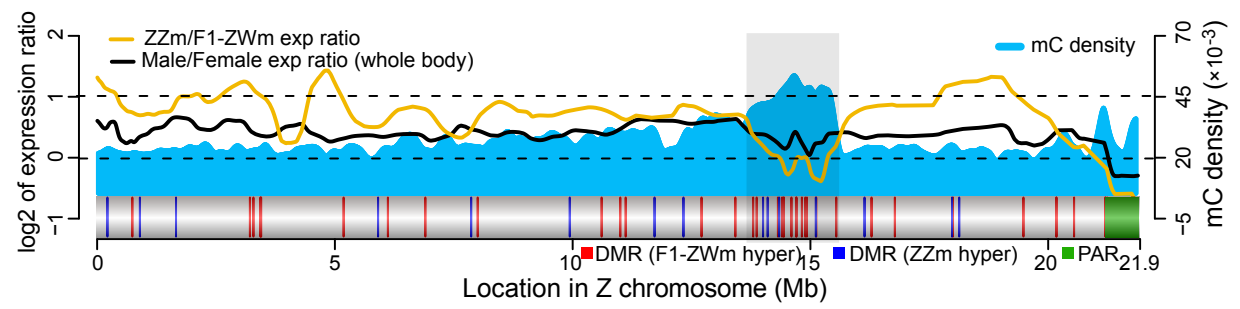

**Figure S9. Dosage compensation of the Z chromosome in pseudo-male testes.** The same as Figure 4A, but replace P-ZWm by F1-ZWm.

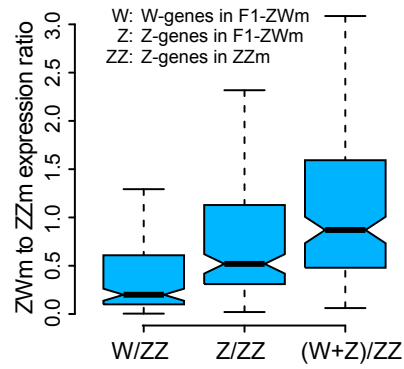

**Figure S10. Pseudo-male to normal-male expression ratios calculated from the 272 W-genes and their Z-counterparts.** From left to right, 1st box represents expression ratios of F1-ZWm W-genes to ZZm Z-genes, 2nd box represents expression ratios of F1-ZWm Z-genes to ZZm Z-genes, and 3rd box represents expression ratios of the sum of F1-ZWm W- and Z-genes to ZZm Z-genes, indicating that the expression sum of W-Z paralogous genes in pseudo-male testes was close to the dosage of Z-genes in normal males.

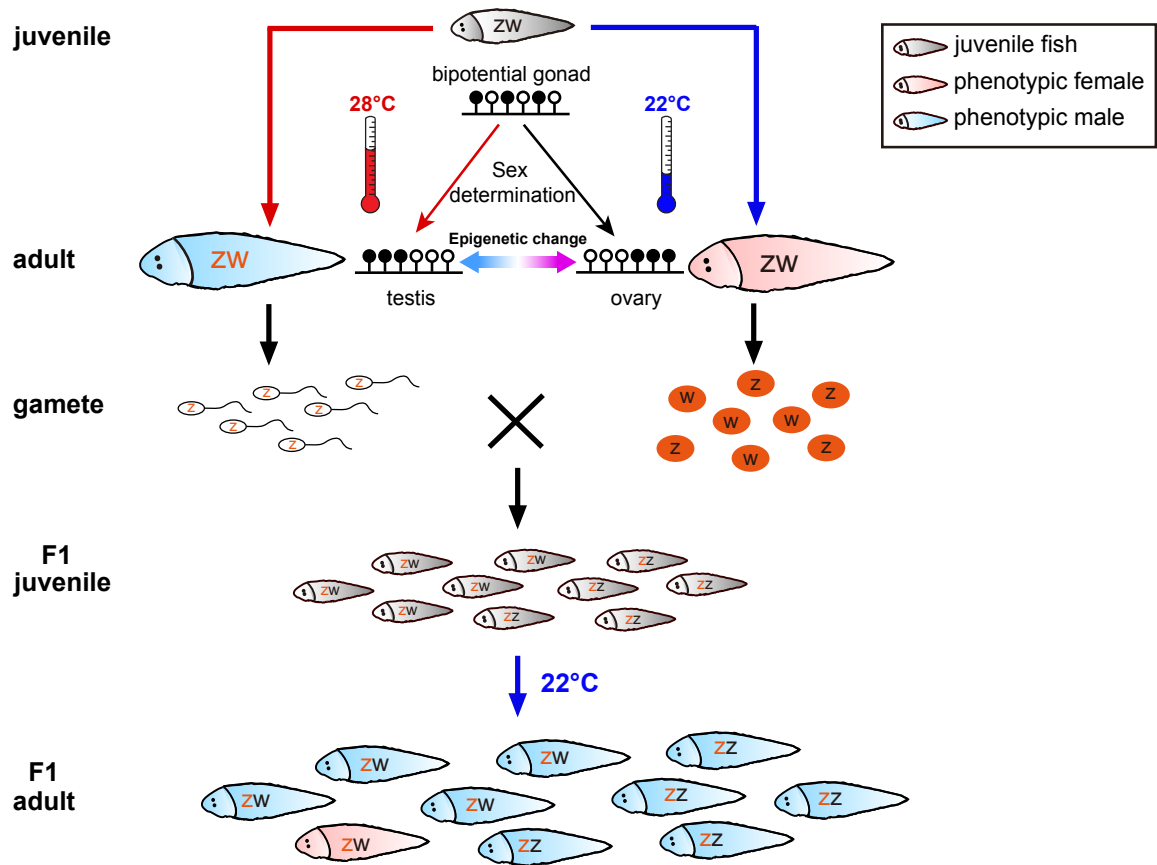

**Figure S11. Transgenerational epigenetic inheritance of sexual reversal.** We previously demonstrated that the Z chromosomes of F1 ZW fish produced by crossing a pseudo-male with a normal female were exclusively derived from the paternal pseudo-males (Chen et al. 2014), explaining why these F1 ZW fish do not require high temperature induction to express the pseudo-male phenotype. In the present study, we further propose that high temperature treatment of juvenile ZW fish produced by normal crossings can change the epigenetic modification of the Z chromosome, and that some of these alterations are transferred to the next generation, so that most of the F1 genetic females become pseudo-males spontaneously.

**Table S1.** Gonadal samples for BS-seq and RNA-seq. Sample names were modified from Chen et al. 2014. In this study, we discussed the inheritance of sex reversal in the F1 generation of pseudo-male, thus regarded P-ZWf and P-ZWm as the parental generation and their offspring as F1 generation.

| Sample                | Genotype | Tissue | BS-seq | RNA-seq | Symbol in this study | Symbol in (Chen et al. 2014) |
|-----------------------|----------|--------|--------|---------|----------------------|------------------------------|
| Parental females      | ZW       | ovary  | √      | √       | P-ZWf                | ZW ovary F1                  |
| Parental pseudo-males | ZW       | testis | √      | √       | P-ZWm                | ZW ovary F2                  |
| F1 females            | ZW       | ovary  | √      |         | F1-ZWf               | ZW testis F1                 |
| F1 pseudo-males       | ZW       | testis | √      | √       | F1-ZWm               | ZW testis F2                 |
| Normal males          | ZZ       | testis | √      | √       | ZZm                  | ZZ testis P                  |

**Table S2.** Statistic of BS-seq for each sample.

| Sample | Libriary         | # Raw reads | # Mapped reads | Mapped ratio (%) | # Unique mapped reads | Unique mapped ratio (%) | Usable depth (X/strand) | Error rate (%) |
|--------|------------------|-------------|----------------|------------------|-----------------------|-------------------------|-------------------------|----------------|
| P-ZWf  | CSGjyaHCGDEAAPEM | 144,644,160 | 93420512       | 64.59            | 83,756,108            | 89.65                   | 8                       | 0.46           |
|        | CSGjyaHCHDEAAPEM | 348,435,048 | 220670209      | 63.33            | 198,174,289           | 89.81                   | 18                      | 0.49           |
|        | Sum              | 493,079,208 | 314090721      | 63.70            | 281,930,397           | 89.76                   | 26                      |                |
| F1-ZWf | CSGodeHCDDEAAPEM | 162,004,640 | 105556596      | 65.16            | 95,559,961            | 90.53                   | 9                       | 0.42           |
|        | CSGodeHCCDEAAPEM | 178,055,666 | 118688757      | 66.66            | 106,940,004           | 90.1                    | 10                      | 0.43           |
|        | Sum              | 340,060,306 | 224245353      | 65.94            | 202,499,965           | 90.30                   | 19                      |                |
| P-ZWm  | CSGodeHCADEAAPEM | 184,809,034 | 133113099      | 72.03            | 120,412,799           | 90.46                   | 11                      | 0.47           |
|        | CSGodeHCBDEAAPEM | 195,359,158 | 131407557      | 67.26            | 118,157,554           | 89.92                   | 11                      | 0.51           |
|        | Sum              | 380,168,192 | 264520656      | 69.58            | 238,570,353           | 90.19                   | 22                      |                |
| F1-ZWm | CSGjyaHCFDEAAPEM | 165,766,754 | 117360775      | 70.8             | 105,567,760           | 89.95                   | 10                      | 0.50           |
|        | CSGjyaHCEDEAAPEM | 146,105,060 | 96539781       | 66.08            | 86,955,707            | 90.07                   | 8                       | 0.55           |
|        | Sum              | 311,871,814 | 213900556      | 68.59            | 192,523,467           | 90.01                   | 18                      |                |
| ZZm    | CSGfttHAGDEAAPEM | 173,643,510 | 130835352      | 75.35            | 120,946,405           | 92.44                   | 11                      | 0.45           |
|        | CSGfttHACDEAAPEM | 202,483,512 | 149353932      | 73.76            | 137,795,573           | 92.26                   | 13                      | 0.47           |
|        | Sum              | 376,127,022 | 280189284      | 74.49            | 258,741,978           | 92.35                   | 24                      |                |

**Table S3.** Ratio of cytosines covered by at least 2 reads in each context.

| Sample | Covered cytosines(%) |       |       |       |
|--------|----------------------|-------|-------|-------|
|        | C                    | CG    | CHG   | CHH   |
| P-ZWf  | 90.47                | 91.63 | 92.43 | 89.64 |
| F1-ZWf | 89.32                | 90.68 | 91.50 | 88.38 |
| P-ZWm  | 90.15                | 91.30 | 92.14 | 89.32 |
| F1-ZWm | 89.51                | 90.64 | 91.57 | 88.65 |
| ZZm    | 90.23                | 91.41 | 92.26 | 89.37 |

**Table S4.** Methylated cytosines detected in each sample.

| Sample | Context | # Covered ( $\geq 2X$ ) | # Methyl   | Ratio (%) |
|--------|---------|-------------------------|------------|-----------|
| P-ZWf  | C       | 166,975,613             | 14,701,339 | 8.8       |
|        | CG      | 17,013,284              | 14,591,388 | 85.76     |
|        | CHG     | 40,445,531              | 24,529     | 0.06      |
|        | CHH     | 109,516,048             | 85,422     | 0.08      |
| F1-ZWf | C       | 164,852,227             | 14,442,780 | 8.76      |
|        | CG      | 16,836,940              | 14,328,790 | 85.10     |
|        | CHG     | 40,037,214              | 27,451     | 0.07      |
|        | CHH     | 107,977,519             | 86,539     | 0.08      |
| P-ZWm  | C       | 166,391,393             | 14,665,707 | 8.81      |
|        | CG      | 16,952,463              | 14,566,134 | 85.92     |
|        | CHG     | 40,317,332              | 24,483     | 0.06      |
|        | CHH     | 109,120,954             | 75,090     | 0.07      |
| F1-ZWm | C       | 165,205,450             | 14,548,348 | 8.81      |
|        | CG      | 16,829,003              | 14,453,261 | 85.88     |
|        | CHG     | 40,069,206              | 23,869     | 0.06      |
|        | CHH     | 108,306,649             | 71,218     | 0.07      |
| ZZm    | C       | 161,661,386             | 14,346,227 | 8.87      |
|        | CG      | 16,507,031              | 14,219,773 | 86.14     |
|        | CHG     | 39,266,490              | 31,367     | 0.08      |
|        | CHH     | 105,886,999             | 95,087     | 0.09      |



**Table S5.** Methylation levels of different chromosomes.

|        | <b>P-ZWf</b> | <b>F1-ZWf</b> | <b>P-ZWm</b> | <b>F1-ZWm</b> | <b>ZZm</b> | <b>ovary mean</b> | <b>testis mean</b> | <b>testis minus ovary</b> |
|--------|--------------|---------------|--------------|---------------|------------|-------------------|--------------------|---------------------------|
| chr1   | 0.66         | 0.66          | 0.75         | 0.77          | 0.78       | 0.66              | 0.77               | 0.11                      |
| chr2   | 0.67         | 0.67          | 0.77         | 0.78          | 0.79       | 0.67              | 0.78               | 0.11                      |
| chr3   | 0.69         | 0.69          | 0.78         | 0.80          | 0.81       | 0.69              | 0.80               | 0.11                      |
| chr4   | 0.67         | 0.67          | 0.77         | 0.79          | 0.80       | 0.67              | 0.78               | 0.11                      |
| chr5   | 0.67         | 0.67          | 0.77         | 0.79          | 0.80       | 0.67              | 0.78               | 0.11                      |
| chr6   | 0.66         | 0.66          | 0.75         | 0.77          | 0.78       | 0.66              | 0.77               | 0.11                      |
| chr7   | 0.67         | 0.67          | 0.76         | 0.78          | 0.79       | 0.67              | 0.77               | 0.11                      |
| chr8   | 0.67         | 0.68          | 0.76         | 0.78          | 0.79       | 0.67              | 0.78               | 0.10                      |
| chr9   | 0.66         | 0.66          | 0.75         | 0.77          | 0.77       | 0.66              | 0.76               | 0.10                      |
| chr10  | 0.66         | 0.66          | 0.75         | 0.76          | 0.78       | 0.66              | 0.76               | 0.10                      |
| chr11  | 0.66         | 0.66          | 0.75         | 0.77          | 0.78       | 0.66              | 0.77               | 0.11                      |
| chr12  | 0.67         | 0.67          | 0.76         | 0.78          | 0.79       | 0.67              | 0.78               | 0.11                      |
| chr13  | 0.66         | 0.66          | 0.76         | 0.78          | 0.78       | 0.66              | 0.77               | 0.11                      |
| chr14  | 0.67         | 0.68          | 0.76         | 0.78          | 0.79       | 0.67              | 0.78               | 0.11                      |
| chr15  | 0.66         | 0.66          | 0.76         | 0.77          | 0.78       | 0.66              | 0.77               | 0.11                      |
| chr16  | 0.68         | 0.68          | 0.77         | 0.78          | 0.79       | 0.68              | 0.78               | 0.10                      |
| chr17  | 0.65         | 0.65          | 0.73         | 0.75          | 0.76       | 0.65              | 0.75               | 0.10                      |
| chr18  | 0.67         | 0.67          | 0.76         | 0.77          | 0.78       | 0.67              | 0.77               | 0.10                      |
| chr19  | 0.67         | 0.67          | 0.76         | 0.78          | 0.79       | 0.67              | 0.78               | 0.10                      |
| chr20  | 0.66         | 0.66          | 0.76         | 0.77          | 0.78       | 0.66              | 0.77               | 0.11                      |
| chrZ   | 0.67         | 0.67          | 0.74         | 0.75          | 0.77       | 0.67              | 0.75               | 0.08                      |
| chrW   | 0.73         | 0.73          | 0.75         | 0.77          | 0.00       | 0.73              | 0.76               | 0.03                      |
| genome | 0.67         | 0.67          | 0.76         | 0.78          | 0.78       | 0.67              | 0.77               | 0.10                      |

**Table S6.** GO enrichment for DMGs up-methylated in ovaries.

| GO ID                              | GO Term                                              | Gene Num | P value                | GO Level |
|------------------------------------|------------------------------------------------------|----------|------------------------|----------|
| reproductive developmental process |                                                      |          |                        |          |
| GO:0045137                         | development of primary sexual characteristics        | 17       | $4.91 \times 10^{-3}$  | 4        |
| GO:0046660                         | female sex differentiation                           | 13       | $8.26 \times 10^{-3}$  | 4        |
| GO:0046545                         | development of primary female sexual characteristics | 12       | $1.51 \times 10^{-2}$  | 5        |
| GO:0048608                         | reproductive structure development                   | 17       | $2.92 \times 10^{-2}$  | 4        |
| GO:0008585                         | female gonad development                             | 10       | $3.21 \times 10^{-2}$  | 6        |
| sexual reproduction                |                                                      |          |                        |          |
| GO:0007276                         | gamete generation                                    | 26       | $2.40 \times 10^{-3}$  | 4        |
| GO:0007292                         | female gamete generation                             | 10       | $1.40 \times 10^{-2}$  | 5        |
| GO:0048477                         | oogenesis                                            | 8        | $1.80 \times 10^{-2}$  | 6        |
| GO:0034587                         | piRNA metabolic process                              | 3        | $1.94 \times 10^{-2}$  | 7        |
| GO:0007283                         | spermatogenesis                                      | 18       | $1.94 \times 10^{-2}$  | 6        |
| GO:0007140                         | male meiosis                                         | 4        | $4.36 \times 10^{-2}$  | 6        |
| meiosis                            |                                                      |          |                        |          |
| GO:0000279                         | M phase                                              | 28       | $3.11 \times 10^{-3}$  | 5        |
| GO:0007126                         | meiosis                                              | 12       | $3.75 \times 10^{-3}$  | 5        |
| GO:0007129                         | synapsis                                             | 4        | $1.07 \times 10^{-2}$  | 5        |
| GO:0007127                         | meiosis I                                            | 7        | $1.68 \times 10^{-2}$  | 5        |
| pattern specification process      |                                                      |          |                        |          |
| GO:0003002                         | regionalization                                      | 40       | $1.36 \times 10^{-10}$ | 4        |
| GO:0009952                         | anterior/posterior pattern specification             | 30       | $6.48 \times 10^{-10}$ | 5        |
| other developmental process        |                                                      |          |                        |          |
| GO:0048706                         | embryonic skeletal system development                | 22       | $8.36 \times 10^{-11}$ | 6        |
| GO:0009792                         | embryo development ending in birth or egg hatching   | 46       | $1.19 \times 10^{-6}$  | 4        |
| GO:0043009                         | chordate embryonic development                       | 45       | $2.60 \times 10^{-6}$  | 5        |
| GO:0048732                         | gland development                                    | 28       | $5.97 \times 10^{-6}$  | 5        |
| GO:0030326                         | embryonic limb morphogenesis                         | 17       | $7.74 \times 10^{-4}$  | 6        |
| GO:0061138                         | morphogenesis of a branching epithelium              | 17       | $2.51 \times 10^{-3}$  | 4        |
| GO:0042471                         | ear morphogenesis                                    | 15       | $5.46 \times 10^{-3}$  | 6        |
| GO:0021615                         | glossopharyngeal nerve morphogenesis                 | 3        | $6.39 \times 10^{-3}$  | 5        |
| GO:0035136                         | forelimb morphogenesis                               | 9        | $1.57 \times 10^{-2}$  | 6        |
| GO:0051216                         | cartilage development                                | 17       | $1.80 \times 10^{-2}$  | 5        |
| GO:0021545                         | cranial nerve development                            | 8        | $2.68 \times 10^{-2}$  | 5        |
| GO:0055123                         | digestive system development                         | 14       | $2.92 \times 10^{-2}$  | 5        |
| GO:0021983                         | pituitary gland development                          | 8        | $3.59 \times 10^{-2}$  | 5        |
| GO:0043010                         | camera-type eye development                          | 23       | $4.17 \times 10^{-2}$  | 7        |

**Table S7.** GO enrichment for DMGs up-methylated in testes (ZW/ZZ).

| GO ID                           | GO Term                                                         | Gene Num | P value               | GO Level |
|---------------------------------|-----------------------------------------------------------------|----------|-----------------------|----------|
| response to chemical stimulus   |                                                                 |          |                       |          |
| GO:0070887                      | cellular response to chemical stimulus                          | 224      | $5.19 \times 10^{-5}$ | 4        |
| GO:0070482                      | response to oxygen levels                                       | 57       | $4.20 \times 10^{-4}$ | 4        |
| GO:0010033                      | response to organic substance                                   | 261      | $2.42 \times 10^{-3}$ | 4        |
| GO:0071383                      | cellular response to steroid hormone stimulus                   | 29       | $3.86 \times 10^{-3}$ | 6        |
| GO:0006935                      | chemotaxis                                                      | 117      | $3.88 \times 10^{-3}$ | 4        |
| GO:0006979                      | response to oxidative stress                                    | 49       | $5.06 \times 10^{-3}$ | 4        |
| GO:0071375                      | cellular response to peptide hormone stimulus                   | 59       | $1.50 \times 10^{-2}$ | 6        |
| GO:0000302                      | response to reactive oxygen species                             | 29       | $1.52 \times 10^{-2}$ | 5        |
| developmental process           |                                                                 |          |                       |          |
| GO:0001944                      | vasculature development                                         | 139      | $1.83 \times 10^{-8}$ | 5        |
| GO:0072358                      | cardiovascular system development                               | 197      | $4.51 \times 10^{-8}$ | 5        |
| GO:0001525                      | angiogenesis                                                    | 95       | $1.67 \times 10^{-6}$ | 4        |
| GO:0060429                      | epithelium development                                          | 138      | $1.43 \times 10^{-5}$ | 5        |
| GO:0007431                      | salivary gland development                                      | 20       | $1.07 \times 10^{-4}$ | 6        |
| GO:0007507                      | heart development                                               | 107      | $3.07 \times 10^{-4}$ | 5        |
| GO:0035272                      | exocrine system development                                     | 24       | $1.87 \times 10^{-3}$ | 5        |
| GO:0048729                      | tissue morphogenesis                                            | 116      | $2.88 \times 10^{-3}$ | 4        |
| GO:0030865                      | cortical cytoskeleton organization                              | 11       | $3.98 \times 10^{-3}$ | 7        |
| GO:0031099                      | regeneration                                                    | 41       | $4.57 \times 10^{-3}$ | 4        |
| GO:0048812                      | neuron projection morphogenesis                                 | 129      | $7.68 \times 10^{-3}$ | 7        |
| GO:0060027                      | convergent extension involved in gastrulation                   | 17       | $8.83 \times 10^{-3}$ | 5        |
| GO:0035088                      | establishment or maintenance of apical/basal cell polarity      | 13       | $1.13 \times 10^{-2}$ | 5        |
| GO:0060485                      | mesenchyme development                                          | 45       | $1.52 \times 10^{-2}$ | 5        |
| GO:0061061                      | muscle structure development                                    | 100      | $2.14 \times 10^{-2}$ | 4        |
| GO:0060539                      | diaphragm development                                           | 6        | $2.14 \times 10^{-2}$ | 6        |
| GO:0048659                      | smooth muscle cell proliferation                                | 19       | $2.42 \times 10^{-2}$ | 4        |
| GO:0072110                      | glomerular mesangial cell proliferation                         | 6        | $3.38 \times 10^{-2}$ | 4        |
| GO:0001890                      | placenta development                                            | 27       | $4.21 \times 10^{-2}$ | 5        |
| cellular component organization |                                                                 |          |                       |          |
| GO:0000902                      | cell morphogenesis                                              | 190      | $9.02 \times 10^{-4}$ | 5        |
| GO:0030036                      | actin cytoskeleton organization                                 | 88       | $1.16 \times 10^{-3}$ | 4        |
| GO:0030010                      | establishment of cell polarity                                  | 21       | $6.61 \times 10^{-3}$ | 4        |
| GO:0008360                      | regulation of cell shape                                        | 23       | $9.04 \times 10^{-3}$ | 4        |
| GO:0034329                      | cell junction assembly                                          | 42       | $1.34 \times 10^{-2}$ | 4        |
| GO:0007015                      | actin filament organization                                     | 44       | $1.58 \times 10^{-2}$ | 5        |
| signal transduction             |                                                                 |          |                       |          |
| GO:0009966                      | regulation of signal transduction                               | 296      | $1.25 \times 10^{-6}$ | 4        |
| GO:0007167                      | enzyme linked receptor protein signaling pathway                | 179      | $7.92 \times 10^{-6}$ | 5        |
| GO:0043405                      | regulation of MAP kinase activity                               | 59       | $2.99 \times 10^{-4}$ | 5        |
| GO:0071902                      | positive regulation of protein serine/threonine kinase activity | 54       | $2.99 \times 10^{-4}$ | 9        |
| GO:0007166                      | cell surface receptor signaling pathway                         | 371      | $3.20 \times 10^{-4}$ | 4        |
| GO:0043401                      | steroid hormone mediated signaling pathway                      | 21       | $2.92 \times 10^{-3}$ | 5        |
| GO:0043408                      | regulation of MAPK cascade                                      | 63       | $4.81 \times 10^{-3}$ | 6        |
| GO:0007243                      | intracellular protein kinase cascade                            | 128      | $5.39 \times 10^{-3}$ | 5        |
| GO:0007266                      | Rho protein signal transduction                                 | 39       | $5.99 \times 10^{-3}$ | 7        |

|                       |                                                                          |     |                       |   |
|-----------------------|--------------------------------------------------------------------------|-----|-----------------------|---|
| GO:0046578            | regulation of Ras protein signal transduction                            | 68  | $7.00 \times 10^{-3}$ | 6 |
| GO:0070374            | positive regulation of ERK1 and ERK2 cascade                             | 21  | $9.46 \times 10^{-3}$ | 7 |
| GO:0071526            | semaphorin-plexin signaling pathway                                      | 8   | $1.15 \times 10^{-2}$ | 5 |
| GO:0007264            | small GTPase mediated signal transduction                                | 107 | $1.52 \times 10^{-2}$ | 5 |
| GO:0048008            | platelet-derived growth factor receptor signaling pathway                | 13  | $1.60 \times 10^{-2}$ | 7 |
| GO:0070431            | nucleotide-binding oligomerization domain containing 2 signaling pathway | 4   | $2.51 \times 10^{-2}$ | 7 |
| GO:0050852            | T cell receptor signaling pathway                                        | 19  | $2.87 \times 10^{-2}$ | 7 |
| GO:0070427            | nucleotide-binding oligomerization domain containing 1 signaling pathway | 3   | $4.08 \times 10^{-2}$ | 7 |
| biological regulation |                                                                          |     |                       |   |
| GO:2000026            | regulation of multicellular organismal development                       | 207 | $5.73 \times 10^{-7}$ | 4 |
| GO:0009966            | regulation of signal transduction                                        | 296 | $1.25 \times 10^{-6}$ | 4 |
| GO:0045595            | regulation of cell differentiation                                       | 181 | $1.19 \times 10^{-5}$ | 4 |
| GO:0045860            | positive regulation of protein kinase activity                           | 85  | $2.13 \times 10^{-4}$ | 8 |
| GO:0042325            | regulation of phosphorylation                                            | 152 | $3.03 \times 10^{-4}$ | 7 |
| GO:0010952            | positive regulation of peptidase activity                                | 32  | $4.20 \times 10^{-4}$ | 7 |
| GO:0033674            | positive regulation of kinase activity                                   | 87  | $4.52 \times 10^{-4}$ | 7 |
| GO:0060284            | regulation of cell development                                           | 106 | $1.84 \times 10^{-3}$ | 5 |
| GO:0010906            | regulation of glucose metabolic process                                  | 22  | $2.24 \times 10^{-3}$ | 6 |
| GO:0019220            | regulation of phosphate metabolic process                                | 155 | $2.84 \times 10^{-3}$ | 6 |
| GO:0001558            | regulation of cell growth                                                | 57  | $2.88 \times 10^{-3}$ | 4 |
| GO:0043065            | positive regulation of apoptotic process                                 | 109 | $5.32 \times 10^{-3}$ | 6 |
| GO:0044093            | positive regulation of molecular function                                | 190 | $6.19 \times 10^{-3}$ | 4 |
| GO:0008360            | regulation of cell shape                                                 | 23  | $9.04 \times 10^{-3}$ | 4 |
| GO:0050795            | regulation of behavior                                                   | 30  | $2.20 \times 10^{-2}$ | 4 |
| GO:0050920            | regulation of chemotaxis                                                 | 23  | $3.12 \times 10^{-2}$ | 4 |
| GO:0010646            | regulation of cell communication                                         | 213 | $3.53 \times 10^{-2}$ | 4 |

**Table S8 (See excel document).** Expression and methylation of genes related to sex differentiation. For gene expression, genes were categorized into testis-biased (T), ovary-biased (O) and non-biased (N) expression based on RPKM fold changes (FC) between P-ZWf and the mean value of P-ZWm, F1-ZWm and ZZm. Fold change (FC) > 1.5 was chosen as the significant threshold. For DNA methylation, genes were categorized into testis-up-methylated (T), ovary-up-methylated (O) and no significant difference (N) based on whether the promoter region of a given gene harbored identified DMR. DNA methylation profiles of the 16 genes with promoter DMRs are presented in Figure 3C (*gsdf*), Figure 5D (*figla*) and Figure S8 (the rest 14 genes). This table is modified from table S43 in Chen et al. 2014.

**Table S9 (See excel document).** Dosage compensated Z-genes in pseudo-male testes relative to normal male testes. Genes were defined as dosage compensation if RPKM ratio of ZZm/P-ZWm or ZZm/F1-ZWm is between 1/1.5 and 1.5.

**Table S10.** Primers for BS-PCR and RT-PCR experiments.

| Experiment | Gene                     | T <sub>m</sub> (°C) | Primer Sequence 5'-3'         |
|------------|--------------------------|---------------------|-------------------------------|
| BS-PCR     | <i>dmrt1</i>             | 48                  | F: GGTAAATATTGTTATAGTAGTAGTAG |
|            |                          |                     | R: ACRATTACCTACACCACCA        |
| RT-PCR     | <i>gsdf</i>              | 60                  | F: TTCTTCGGTTGTGCTTGCG        |
|            |                          |                     | R: CGGCTCAGTCTGGAGGTTCA       |
|            | <i>figla</i><br>AFE1-2nd | 58                  | F: ACATAGAGAAGTTCAAACGAGCC    |
|            |                          |                     | R: CGGTAGCAGCTTTTAGTGTGTCT    |
|            | <i>figla</i><br>AFE2-3rd | 60                  | F: AACCTCTCGTCTTCACTCCTCTCTC  |
|            |                          |                     | R: TCCCTAGGCCTTCAGTCTGG       |

## Supplemental Experimental Procedures

### Gene Ontology Annotated and Enrichment Analysis

Gene ontology (GO) categories of the tongue sole genes were annotated based on homologous relationships between tongue sole genes and that of zebra fish (*Danio rerio*), Medaka (*Oryzias latipes*) and human (*Homo sapiens*) downloaded from Ensembl (Flicek et al. 2012). Briefly, we first mapped all the tongue sole proteins to the protein sets of these three species separately using BLASTP (Altschul et al. 1990), then GO annotations were assigned for the tongue sole genes according to GO annotations of their best hits in these three species. We required the aligning rate of each tongue sole gene to its best hit must exceed 30%, and the GO annotations from these three species were finally merged to a non-redundant result.

Fisher's Exact Test and Chi-squared Test (Beißbarth and Speed 2004) was employed to estimate whether a list of genes (foreground genes, e.g. DMGs) was enriched in a specific GO category when compared with background genes. P-values were adjusted for multiple testing by consideration of the Benjamini-Hochberg False Discovery Rate (Benjamini et al. 2001), and the adjusted P-value < 0.05 was chosen as the significant threshold.

### Methylation Analysis of *Dmrt1* by Bisulfite-PCR

To track the DNA methylation status of *dmrt1* during gonadal development, we performed bisulfite-PCR for genomic DNA extracted from genetic female and male gonads at different developmental stages, including 4 days post-hatching (dph), 25 dph, 48 dph, 70 dph, 160 dph, 8 m, 10 m, 1 y and 2 y. DNA were extracted using Genomic DNA Extraction Kit (TAKARA). Bisulfite-PCR primers were designed on the first exon of *dmrt1* using Primer Premier 5 (Table S10). For PCR amplification, a 40 µl reaction system was carried out with 1X PCR buffer, 5 mM MgCl<sub>2</sub>, 1 mM dNTP mix, 1 unit of Taq polymerase, 50 pmol of the forward primer and reverse primer respectively, and 50 ng of bisulfite-treated DNA. The PCR cycling conditions were 94 °C for 1 min, followed by 40 cycles of [94 °C for 30 s, 50 °C for 30 s and 72 °C for 30 s], followed by 72 °C for 5 min and stored at 4 °C. PCR products were electrophoresed on 1% agarose gels, followed by bands excised and gel extracted using the Zymoclean Gel DNA Recovery Kit. Purified PCR products were cloned using the pMD18-T Simple Vector cloning kit following the manufacturer's protocol. For each sample, we randomly selected no less than 15 clones for sequencing. All sequencings were performed on an ABI 3730xl DNA analyzer using SP6 or T7 primers.



## Expression of *Dmrt1* and *Gsdf* at Different Developmental Stages

RT-PCR analysis results of *dmrt1* at different developmental stages were obtained from Chen S et al (Chen et al. 2014) by adding the data of two additional time points (8 m and 10 m) using the 1 y sample as control (Chen et al. 2014). For *gsdf*, total RNA of female and male gonads at different developmental stages (4 dph, 48 dph, 70 dph, 160 dph, 1 y, 2 y) were extracted from another batch of fish and reverse transcribed as described previously (Chen et al. 2001). Primers for RT-PCR analysis of *gsdf* were designed using the Primer3 program (Rozen and Skaletsky 2000) (Table S10). The final PCR reactions contained 0.4 mM of each primer, 10  $\mu$ l SYBR Green (Invitrogen) and 80 ng template (cDNA reverse transcribed from a standardized amount of total RNA). RT-PCR was performed on ABI PRISM 7500 Real-Time PCR System using Hotstart Taq polymerase (Qiagen) in a final volume of 20  $\mu$ l and  $\beta$ -actin gene was used as internal reference. All reactions were subjected to: 95°C for 35 s followed by 40 cycles at 95°C for 5 s, 60°C 34 s. Melting curve analysis was applied to all reactions to ensure homogeneity of the reaction product. RT-PCR results were analyzed using 7500 System SDS Software.

## Alternative Splicing and Expression of *Figla*

Additional gonadal RNA extracted from adult fish, including two females, two normal males and two pseudo-males were used for confirming the existence and abundance of the two splicing forms of *figla* in tongue sole. We designed two pairs of primers, spanning AFE1-2nd exon and AFE2-3rd exon respectively (Figure 5D and Table S10). PCRs were performed on all the six samples, followed by agarose gel electrophoresis. As expected, we could not observe any bands in normal male samples, while in female and pseudo-male samples, we observed bands corresponding to these two pair of primes with expected fragment sizes. Then we also performed RT-PCR on all the six samples to test the relative abundances of the two splicing forms in different samples. RT-PCR were performed with the same protocol as described above.

## Supplemental References

- Altschul SF, Gish W, Miller W, Myers EW, Lipman DJ. 1990. Basic local alignment search tool. *J Mol Biol* **215**(3): 403-410.
- Altschul SF, Madden TL, Schaffer AA, Zhang J, Zhang Z, Miller W, Lipman DJ. 1997. Gapped BLAST and PSI-BLAST: a new generation of protein database search programs. *Nucleic acids research* **25**(17): 3389-3402.
- Beißbarth T, Speed TP. 2004. GOstat: find statistically overrepresented Gene Ontologies within a group of genes. *Bioinformatics* **20**(9): 1464-1465.
- Benjamini Y, Drai D, Elmer G, Kafkafi N, Golani I. 2001. Controlling the false discovery rate in behavior genetics research. *Behav Brain Res* **125**(1-2): 279-284.
- Campos C, Valente LMP, Fernandes JMO. 2012. Molecular evolution of zebrafish dnmt3 genes and thermal plasticity of their expression during embryonic development. *Gene* **500**(1): 93-100.
- Chen S, Hong Y, Scherer SJ, Scharl M. 2001. Lack of ultraviolet-light inducibility of the medakafish (*Oryzias latipes*) tumor suppressor gene p53. *Gene* **264**(2): 197-203.
- Chen S, Zhang G, Shao C, Huang Q, Liu G, Zhang P, Song W, An N, Chalopin D, Volff J et al. 2014. Whole-genome sequence of a flatfish provides insights into ZW sex chromosome evolution and adaptation to a benthic lifestyle. *Nat Genet* doi: 10.1038/ng.2890.
- Flicek P, Amode MR, Barrell D, Beal K, Brent S, Carvalho-Silva D, Clapham P, Coates G, Fairley S, Fitzgerald S. 2012. Ensembl 2012. *Nucleic acids research* **40**(D1): D84-D90.
- Rozen S, Skaletsky H. 2000. Primer3 on the WWW for general users and for biologist programmers. *Methods Mol Biol* **132**: 365-386.
- Wu H, Caffo B, Jaffee HA, Feinberg AP, Irizarry RA. 2010. Redefining CpG islands using hidden Markov models. *Biostatistics* **11**(3): 499-514.
