# Supplementary material for: Epigenetic modification and inheritance in sexual reversal of fish
Source: HighWire-hosted journal article supplement (doi:10.1101/gr.162172.113), 2014-02-02
Supplement: Supplemental_Material.xlsx [file Supplemental_Material.xlsx]

## Sheet: Table S8
Table S8. Expression and methylation of genes related to sex differentiation. For gene expression, genes were categorized into testis-biased (T), ovary-biased (O) and non-biased (N) expression based on RPKM fold changes (FC) between P-ZWf and the mean value of P-ZWm, F1-ZWm and ZZm. Fold change (FC) > 1.5 was chosen as the significant threshold. For DNA methylation, genes were categorized into te…
Gene ID	Chromosome	Symbol	CGI in promoter	Expression (RPKM)						Methylation level								Gene full name
				P-ZWf	P-ZWm	F1-ZWm	ZZm	Bias	FC	DMR location	CGI in DMR	DMR length (bp)	CpG number	Mean level (ovary)	Mean level (testis)	Bias	FC
Cse_R020243	chr2	amh	No	0.11	14.43	11.23	150.3	T	58.65	Chr2:17671750-17672893	No	1144	56	0.354531	0.799423	T	2.25487	anti-Mullerian hormone
Cse_R019270	chr11	amhr2	No	1.39	7.06	12.3	31.82	T	12.27	Chr11:12368750-12369369	No	620	35	0.23613	0.0196464	O	12.019	anti-Mullerian hormone receptor, type II
Cse_R010791	chr20	aqp1	No	0	2.26	201.28	26.62	T	76.72	-	-	-	-	-	-	N	-	aquaporin 1
Cse_R010765	chr20	aqp1o	No	828.88	39.33	0	9.44	O	50.99	-	-	-	-	-	-	N	-	aquaporin 1o
Cse_R018649	chr3	arx	No	0.24	1.51	0	2	N	1.17	Chr3:5201750-5202459	No	710	45	0.317035	0.0424195	O	7.47381	aristaless related homeobox
Cse_R006810	chr15	atrx	Yes	34.86	44.31	62.18	44.6	N	1.44	-	-	-	-	-	-	N	-	alpha thalassemia/mental retardation syndrome X-linked homolog (human)
Cse_R008247	chr17	cbx2	Yes	55.35	49.87	24	24.05	O	1.7	-	-	-	-	-	-	N	-	chromobox homolog 2
Cse_R018728	chr20	cd220	No	1.64	4.33	3.51	22.2	T	6.11	-	-	-	-	-	-	N	-	insulin receptor
Cse_R009842	chr2	cd220	No	1.59	3.49	4.58	6.18	T	2.99	-	-	-	-	-	-	N	-	insulin receptor
Cse_R005015	chr13	ctnnb1	No	82.98	107.41	97.91	68.2	N	1.1	-	-	-	-	-	-	N	-	beta-catenin
Cse_R019874	chr20	cxcr4a	No	0.17	5.87	8.9	1.94	T	5.57	Chr20:5929250-5930692	No	1443	61	0.408478	0.856181	T	2.09603	chemokine (C-X-C motif) receptor 4
Cse_R012562	chr5	cyp19a1a	No	1.03	2.31	6.26	8.11	T	5.4	Chr5:7956250-7956733	No	484	19	0.249882	0.0376357	T	6.63949	cytochrome P450, family 19, subfamily A, polypeptide 1a
Cse_R021368	chr6	cyp19a1b	No	0	0	0.61	0.78	N	1	-	-	-	-	-	-	N	-	cytochrome P450, family 19, subfamily A, polypeptide 1b
Cse_R021479	chr16	dax1	No	3.5	3.69	3.34	16.96	T	2.28	-	-	-	-	-	-	N	-	dosage-sensitive sex reversal-adrenal hypoplasia congenita critical region on the X chromosome, gene 1
Cse_R008770	chr18	daz1	No	20.9	188.1	312.51	212.57	T	11.37	Chr18:8409250-8409653	No	404	18	0.332228	0.0347093	O	9.57173	deleted in azoospermia 1
Cse_R002534	chr10	dhh	No	0	1.6	2.9	20.74	T	8.41	-	-	-	-	-	-	N	-	desert hedgehog
Cse_R004204	chr12	dkk1	Yes	0.19	1.88	19.97	0.27	T	7.37	-	-	-	-	-	-	N	-	dickkopf homolog 1
Cse_R020696	chr9	dkk2	No	0	0	0.54	2.43	N	1	-	-	-	-	-	-	N	-	dickkopf homolog 2
Cse_R022120	chrZ	dmrt1	No	0	39.56	10.84	71.17	T	40.52	ChrZ:8567750-8568496	No	747	40	0.242049	0.0161261	O	15.0098	Doublesex- and mab-3-related transcription factor 1
Cse_R021546	chr12	emx2	Yes	0.7	1.19	2.15	8.08	T	3.81	chr12:11072500-11072998	No	499	36	0.199046	0.0331561	O	6.00328	empty spiracles homeobox 2
Cse_R015779	chr9	fgf20a	Yes	0.25	0.32	0.29	0.56	N	1	-	-	-	-	-	-	N	-	fibroblast growth factor 20
Cse_R006206	chr15	fgf20b	Yes	4.43	14.35	27.05	12.1	T	4.03	-	-	-	-	-	-	N	-	fibroblast growth factor 20
Cse_R016079	chrW	figla	Yes	34.23	2.97	11.26	0	O	7.22	ChrW:14885000-14885976	Yes	977	19	0.463639	0.110536	O	4.19448	factor in the germline alpha
Cse_R022133	chrZ	figla (pseudogene)	No	0	0.7	0.32	0.23	N	1	-	-	-	-	-	-	N	-	factor in the germline alpha
Cse_R021526	chr4	foxl2	Yes	3.02	1.67	1.08	2.77	O	1.64	-	-	-	-	-	-	N	-	forkhead box L2
Cse_R017224	chrZ	fst	Yes	0.8	0.76	1.6	4.54	T	2.3	-	-	-	-	-	-	N	-	Follistatin
Cse_R013761	chr7	gata4	Yes	0.32	6.78	4.64	7.98	T	6.47	-	-	-	-	-	-	N	-	GATA binding protein 4
Cse_R005415	chr14	gsdf	No	18	318.7	327.1	597.83	T	23.03	Chr14:27544250-27545108	No	859	35	0.582604	0.152357	O	3.82394	gonadal somatic cell derived factor
Cse_R009697	chr19	lgr8	No	0.32	1.13	1.21	4.41	T	2.25	-	-	-	-	-	-	N	-	relaxin/insulin-like family peptide receptor 2
Cse_R009838	chr2	lhx9	No	1.37	18.06	13.72	21.81	T	13.04	Chr2:4959000-4959494	No	495	9	0.261663	0.0576175	O	4.54139	LIM homeobox 9
Cse_R011784	chr4	lim1	Yes	0.45	0.38	1.55	1.21	N	1.05	-	-	-	-	-	-	N	-	LIM homeobox 1
Cse_R004397	chr12	pax2a	Yes	0	0.44	0.27	2.47	N	1.06	-	-	-	-	-	-	N	-	paired box gene 2a
Cse_R014998	chr8	pax2b	Yes	0	0	0.13	0.24	N	1	-	-	-	-	-	-	N	-	paired box gene 2b
Cse_R006353	chr15	pdgfrb	No	3.55	4.36	7.52	20.47	T	3.04	Chr15:10686750-10687482	No	733	24	0.337753	0.818367	T	2.42298	platelet derived growth factor receptor beta
Cse_R011327	chr3	pgd2	No	4.77	8.85	10.9	320.5	T	23.78	-	-	-	-	-	-	N	-	prostaglandin D2 synthase
Cse_R018196	scaffold1282	pod1	No	57.81	369.28	196.46	346.6	T	5.26	-	-	-	-	-	-	N	-	transcription factor 21
Cse_R018277	Z_scaffold1319	ptch1	No	0.16	0.84	0.99	3.66	T	1.83	-	-	-	-	-	-	N	-	patched 1
Cse_R016021	chrW	ptch1	Yes	0.47	0.64	0.67	0	N	1	-	-	-	-	-	-	N	-	patched 1
Cse_F003435	chr13	rspo1	No	0.41	1.55	2.36	4.13	T	2.68	-	-	-	-	-	-	N	-	R-spondin 1
Cse_R004637	chr13	rspo2	Yes	0.48	0	0	0.35	N	1	-	-	-	-	-	-	N	-	R-spondin 2
Cse_R005061	chr13	rspo3	No	0.92	0.29	0.26	0.5	N	1	-	-	-	-	-	-	N	-	R-spondin 3
Cse_R003828	chr11	rspo4	No	1.73	0.44	0	2.03	O	1.73	-	-	-	-	-	-	N	-	R-spondin 4
Cse_R018932	chr9	sdf1a	No	0	0	23.6	59.12	T	27.57	Chr9:15008750-15009970	No	1221	35	0.327487	0.848973	T	2.59239	stromal cell-derived factor 1
Cse_R017371	chrZ	sf1	No	0	3.07	5	20.47	T	9.51	-	-	-	-	-	-	N	-	steroidogenic factor 1
Cse_R016234	chrW	sf1 (pseudogene)	No	0	0.5	1.94	0	N	1	-	-	-	-	-	-	N	-	steroidogenic factor 1
Cse_R005325	chr14	sf1	No	0	0	0.6	0	N	1	-	-	-	-	-	-	N	-	steroidogenic factor 1
Cse_R007785	chr17	sox8	Yes	2.12	1.73	0.57	5.2	N	1.18	-	-	-	-	-	-	N	-	SRY (sex determining region Y)-box 8
Cse_R008386	chr17	sox9a	Yes	0	3.54	6.68	13.11	T	7.78	-	-	-	-	-	-	N	-	SRY-box containing gene 9a
Cse_R014685	chr8	sox9b	Yes	0	0.25	0.34	2.02	N	1	-	-	-	-	-	-	N	-	SRY (sex determining region Y)-box 9
Cse_R008713	chr18	srd5a1	Yes	6.78	3.6	1	9.45	N	1.45	-	-	-	-	-	-	N	-	steroid-5-alpha-reductase, alpha polypeptide 1
Cse_R015835	chr9	srd5a2	No	0.68	10.64	16.37	30.14	T	19.05	-	-	-	-	-	-	N	-	steroid-5-alpha-reductase, alpha polypeptide 2
Cse_R005517	chr14	vasa	No	68.01	99.6	83.28	135.5	T	1.56	Chr14:11352250-11353411	No	1162	63	0.370263	0.0706945	O	5.2375	DEAD (Asp-Glu-Ala-Asp) box polypeptide 4
Cse_R019600	chr11	wnt4a	No	0	0.21	0.19	0.74	N	1	-	-	-	-	-	-	N	-	wingless-type MMTV integration site family, member 4a
Cse_F007376	chr13	wnt4b	No	0	0.17	0	0	N	1	-	-	-	-	-	-	N	-	wingless-type MMTV integration site family, member 4b
Cse_R013026	chr6	wt1a	No	3.83	22.86	19.43	35.45	T	6.77	Chr6:1756750-1757854	No	1105	64	0.254911	0.828934	T	3.25185	wilms tumor 1a
Cse_R012523	chr5	wt1b	No	1.17	5.71	2.87	7.1	T	4.47	Chr5:13207250-13208650	No	1401	41	0.336661	0.844845	T	2.50948	wilms tumor 1b
Cse_R010502	chr20	zp3a	No	2010.07	130.69	0	0.68	O	45.9	-	-	-	-	-	-	N	-	zona pellucida glycoprotein 3a
Cse_R018460	chr17	zp3b	No	4474.61	302.65	1.16	2.06	O	43.89	-	-	-	-	-	-	N	-	Zona pellucida glycoprotein 3b

## Sheet: Table S9
Table S9. Dosage compensated Z-genes in pseudo-male testes relative to normal male testes. Genes were defined as dosage compensation if RPKM ratio of ZZm/P-ZWm or ZZm/F1-ZWm is between 1/1.5 and 1.5.
GeneID	Start	End	ZZm/P-ZWm	ZZm/F1-ZWm	ZZm/P-ZWf	Gene Symbol
Cse_R016878	105410	124831	1.07	1.41	1.21	pole
Cse_R017344	174135	177499	0.93	0.56	1.55	kctd10
Cse_R016682	177993	184864	1.85	0.94	2.08	ube3b
Cse_R016637	314449	324350	1.82	0.46	1.82	trpv4
Cse_R017007	539349	541615	1.04	1.38	0.13	polr3d
Cse_R016973	555766	559931	0.63	1.53	0.7	gins4
Cse_R017309	561535	564820	1.13	1.8	2.81	arid5a
Cse_R017216	589465	590434	1.42	0.87	1.04	ube2d4
Cse_R016762	801670	810243	1.53	1.32	3.36	ehmt1
Cse_R016580	812230	887328	1.2	0.28	2.14	cacna1b
Cse_R017338	1016274	1031175	1.79	0.76	2.43	tjp2
Cse_R016498	1066859	1070465	1.71	1.1	8	ptar1
Cse_R016655	1182298	1184327	1.14	0.8	2.4	ydjc
Cse_R017126	1403430	1404610	0.87	0.56	2.36	dtx3l
Cse_R017201	1497640	1499346	0.87	1.43	0.82	sub1
Cse_R016429	1504518	1518664	1.71	0.77	11.39	zfr
Cse_R017116	1550438	1577753	1.23	1.09	3.58	megf9
Cse_R016948	1787934	1807127	0.97	1.23	0.14	mxd1
Cse_R016453	1916562	1918730	0.71	1.12	6.45	znf703
Cse_R016858	2020051	2024122	1.64	1.13	0.63	tia1
Cse_R016604	2033150	2046248	0.08	1.33	0.01	lrp2
Cse_R017043	2190434	2193781	1.1	1.24	1.38	anapc7
Cse_R017199	2205400	2207695	1.02	1.4	8.77	rad9b
Cse_R017265	2222030	2225141	1.3	1.1	0.44	ppp1cc
Cse_R016440	2284539	2339055	1.15	0.69	2.57	cux2
Cse_R017280	2351300	2366870	1.1	0.4	8.92	mtmr3
Cse_R017312	2737675	2742517	1.21	0.75	0.98	golga7
Cse_R017099	3137932	3151647	1.36	1.27	8.81	rgl1
Cse_R017259	3156725	3159675	1.16	1.03	0.29	ptges2
Cse_R016712	3161009	3165543	0.93	0.98	0.42	gle1
Cse_R016795	3167098	3168375	1.06	1.25	1.92	tmem127
Cse_R017035	3311085	3338249	1.32	1.36	6.61	bmp2k
Cse_R017062	3668459	3678384	1.52	0.2	2.83	pitpnm2
Cse_R016840	3730790	3743684	1.42	1.48	0.46	hip1r
Cse_R016592	3820165	3838432	1.58	1.38	2.29	clip1
Cse_R016865	3856826	3872968	0.92	1.66	0.74	mlxip
Cse_R017236	3882970	3889218	2.2	0.55	0.4	rabgef1
Cse_R016760	4018879	4020452	1.43	0.58	1.54	rfk
Cse_R017220	4086279	4114833	1.9	0.97	11.85	vps13a
Cse_R017143	4336200	4350839	1.3	1.59	5.17	prkg2
Cse_R016627	4366799	4368157	0.86	0.72	0.82	zscan20
Cse_R016507	4792499	4797771	0.84	1.29	0.36	gtf2h2
Cse_R017135	4799475	4809437	0.74	1.5	0.23	ocln
Cse_R016717	5093853	5098576	0.14	1.47	0.01	slc25a25a
Cse_R016629	5125088	5125627	1.05	0.74	1.96	na
Cse_R016776	5128328	5133047	1.12	0.47	0.81	odf2
Cse_R017059	5139107	5153607	1.38	1.08	4.11	snrnp200
Cse_R016799	5551900	5588874	2.02	0.89	3.55	na
Cse_R017298	5644251	5645216	0.13	1.36	0.01	bnip3l
Cse_R017091	6218550	6221767	0.96	0.87	0.63	znf131
Cse_R016473	6236803	6239508	1.8	0.85	2.29	creb3l3
Cse_R017146	6839922	6842760	1.33	1.27	1.27	habp4
Cse_R016726	6845774	6917962	1.13	0.72	2.85	znf366
Cse_R016916	6998209	7004910	1.12	0.35	1.2	rnf165
Cse_R016560	7011264	7015114	1.18	1.41	0.33	atp5a1
Cse_R016959	7087344	7105025	1.1	1.86	5.35	atxn2
Cse_R017365	7329424	7393469	1.17	0.39	3.41	sema6a
Cse_R016505	7810625	7818401	0.97	1.52	3.62	malt1
Cse_R017056	7901311	7905848	0.68	1.11	0.31	ccdc158
Cse_R016937	8617376	8621343	1.4	1.41	0.15	fbp1
Cse_R017254	8734432	8736953	0.82	1.56	3.9	dusp2
Cse_R016540	8826086	8846930	1.01	1.26	3.65	gpam
Cse_R017336	8863213	8865666	0.72	0.93	0.29	pcna
Cse_R017045	8989744	8993656	0.76	0.61	7.61	letm1
Cse_R017317	9120002	9120852	0.81	1.3	1.47	na
Cse_R016811	9125005	9128429	1.67	0.98	1.32	acaa2
Cse_R017032	9280504	9281795	1.41	0.21	5.77	snap29
Cse_R016890	9553698	9560354	0.86	0.77	1.29	paip1
Cse_R016497	9590640	9608154	1.16	0.65	0.96	ndufs4
Cse_R016804	9633751	9695357	1.17	1.3	1.43	arl15
Cse_R016620	10006800	10010126	0.74	0.72	0.54	stambpa
Cse_R017202	10014294	10031033	1.61	1.27	0.26	ppil2
Cse_R017222	10051847	10066666	1.67	0.55	0.8	ypel1
Cse_R016710	10372656	10373386	0.55	1.06	5.64	h2afv
Cse_R016816	10486000	10487325	0.8	0.77	0.16	rdh14
Cse_R016817	10903008	10906071	1.99	0.87	1.32	pebp1
Cse_R017330	10934783	10938294	1.18	1.42	0.7	rfc5
Cse_R016820	11134302	11136599	1.14	0.47	0.46	zgc:110063
Cse_R016631	11644622	11648731	1.58	0.68	0.39	fabg
Cse_R016472	12046326	12099498	1.07	0.91	1.07	fam190a
Cse_R016528	12128906	12156010	1.99	0.54	1.23	trim36
Cse_R017144	12389128	12406796	0.27	2.7	0.26	camsap1b
Cse_R017106	12493058	12497737	1.21	1.4	4.77	inpp5e
Cse_R016994	12910747	12912509	1.39	1.59	5.55	znf214
Cse_R016630	12943542	12944750	1.18	0.21	4.03	na
Cse_R016501	12995645	13016494	1.19	1.05	3.39	gak
Cse_R016690	13023097	13052210	1.82	1.02	1.86	aacs
Cse_R017152	13474599	13478221	0.62	1.38	0.23	med27
Cse_R016643	13491426	13492828	0.89	1.72	0.36	endog
Cse_R016851	13532239	13535445	0.91	0.68	0.58	ppapdc3
Cse_R016835	13537678	13542463	0.73	0.96	0.34	wdr5
Cse_R016526	13586709	13593123	1.64	1.31	2.24	pomt1
Cse_R016418	13674159	13685767	0.74	1.91	0.94	dab2ip
Cse_R017023	13716771	13722338	0.85	1.17	2	nacc2
Cse_R016692	13729821	13738640	0.68	0.89	0.85	qsox2
Cse_R017291	13740204	13741320	1.04	1.45	2.31	si:ch211-215c18.4
Cse_R016781	13747981	13753926	0.99	1.37	0.22	ddx31
Cse_R016548	13766827	13779063	0.53	0.83	1.5	tsc1
Cse_R016704	13935837	13936922	2.09	0.55	1.98	cep110
Cse_R016958	14091841	14101628	0.88	0.71	2.05	hira
Cse_R017320	14309358	14312151	0.62	0.93	0.5	rnf214
Cse_R017187	14318960	14324390	0.98	0.73	1.75	sncaip
Cse_R016466	14418177	14418613	0.5	0.97	0.05	actg1
Cse_R016554	14434280	14449900	1.29	0.93	4.32	parp14
Cse_R017351	14458354	14459446	0.81	0.74	0.46	na
Cse_R016417	14463587	14481286	0.61	0.79	8.61	pik3r1
Cse_R016752	14483985	14485008	1.06	0.7	0.45	srp19
Cse_R016444	14529725	14532668	0.81	0.61	0.07	mak16
Cse_R016701	14538154	14539534	0.76	1.86	0.98	na
Cse_R017334	14550653	14557009	1.33	1.11	3.75	lrrc2
Cse_R016531	14577211	14579064	1.06	0.81	1.14	nudt18
Cse_R017363	14584327	14588114	0.52	0.96	0.17	ercc6l
Cse_R017028	14631544	14633237	1.27	1.57	1.38	tor2a
Cse_R017120	14634857	14639324	1.7	0.85	2.1	sh2d3c
Cse_R016904	14669533	14674050	0.97	0.41	0.42	natterin-3
Cse_R017370	14686351	14687554	0.78	0.72	0.1	lsm1
Cse_R017134	14719142	14723229	0.59	0.99	5.08	elmod3
Cse_R016773	14749829	14752989	0.75	1.49	0.24	pold2
Cse_R016510	14914258	14914573	1.13	0.78	0.36	cox6a1
Cse_R016544	14939583	14954707	0.71	1.13	2.44	msi1
Cse_R016649	14956981	14962018	0.71	0.7	3.06	hnf1a
Cse_R016928	14962624	14963989	0.61	0.78	0.1	na
Cse_R016899	14971358	14977048	0.97	0.56	1.28	rnf10
Cse_R016783	14981053	14985174	0.82	0.6	3.31	ddb_g0295729
Cse_R016743	14997376	14998610	0.4	1.26	0.09	ctu1
Cse_R017195	15017748	15018926	1.66	0.34	2.94	rnf181
Cse_R016763	15021328	15024247	1.15	1.22	6.4	tmem150a
Cse_R017218	15040198	15054606	0.65	0.84	1.17	tnks
Cse_R017109	15055814	15063788	1.31	1.69	3.69	piwil2
Cse_R017092	15064895	15065374	1.29	1.57	6	na
Cse_R016438	15067040	15069262	1	0.77	2.69	atad1a
Cse_R016530	15225712	15227157	0.41	1.13	0.13	na
Cse_R016876	15238138	15250292	1.09	0.82	11.85	golga3
Cse_R016999	15284289	15289651	0.7	0.99	2.16	dgcr8
Cse_R017223	15292336	15296322	1.02	0.61	0.37	trmt2a
Cse_R016666	15368646	15380285	1.4	1.19	1.56	gnb1l
Cse_R016938	15533880	15544574	1.04	0.63	6.94	myst3
Cse_R017145	15583875	15608354	1.17	1.49	0.9	col4a3bp
Cse_R016761	15610041	15614870	1.77	1.05	2.15	polk
Cse_R016646	15617289	15623053	0.92	0.92	1.52	ankdd1b
Cse_R017211	15844360	15845067	0.81	0.82	0.24	xrcc4
Cse_R016747	15921553	15924810	1.16	0.31	10.15	klf9
Cse_R016492	16026185	16037032	1.3	0.51	1.83	rab11fip1
Cse_R017209	16406625	16415716	1.35	1.5	0.64	hnrnpk
Cse_R017101	16417590	16422250	1.01	1.12	0.6	rmi1
Cse_R017364	16721063	16734557	1.13	1.31	1.14	naa35
Cse_R016956	16790123	16813659	1.49	0.92	5.71	nipbl
Cse_R017285	17697871	17703298	0.92	0.75	0.56	vcp
Cse_R016660	17762677	17780889	1.75	0.33	3.01	epg5
Cse_R017341	18459429	18497225	1.24	0.77	1.5	kiaa0825
Cse_R016556	18702056	18726432	1.42	1.36	7.63	tmem2
Cse_R016455	19162554	19171711	1.06	1.08	1.49	zgc:109953
Cse_R017027	19226958	19229028	0.78	0.78	0.38	med22
Cse_R016945	19442798	19445911	1.26	1.04	11.8	hspb11
Cse_R017038	19446863	19453536	1.58	1.16	0.25	smn1
Cse_R016561	19545085	19547677	0.62	0.79	0.06	polr3g
Cse_R017015	19548687	19550516	1.12	1.03	1.08	lysmd3
Cse_R016617	20065171	20072173	1.5	0.62	1.03	papd4
Cse_R017200	20120765	20121078	1.3	1.16	0.11	na
Cse_R016432	21225580	21230566	0.59	1.49	0.41	anapc5
Cse_R017242	21299722	21320445	0.84	0.93	1.87	rasal1
Cse_R016583	21747117	21756160	0.72	0.69	1.82	lmx1b
